# Supplementary material for: Portable Mobile Gait Monitor System Based on Triboelectric Nanogenerator for Monitoring Gait and Powering Electronics
Source: MDPI journal article supplement (doi:10.3390/en14164996), 2021-08-14
Supplement: s1 [file s1]

---

# Portable Mobile Gait Monitor System Based on Triboelectric Nanogenerator for Monitoring Gait and Powering Electronics

Yupeng Mao <sup>1,\*</sup>, Yongsheng Zhu <sup>1</sup>, Tianming Zhao <sup>2</sup>, Changjun Jia <sup>1</sup>, Xiao Wang <sup>3</sup> and Qi Wang <sup>2,\*</sup>

<sup>1</sup> Physical Education Department, Northeastern University, Shenyang 110819, China; 2001276@stu.neu.edu.cn (Y.Z.); 2071367@stu.neu.edu.cn (C.J.)

<sup>2</sup> College of Sciences, Northeastern University, Shenyang 110819, China; zha-otm @stumail.neu.edu.cn

<sup>3</sup> College of Physical Education, Chongqing University, Chongqing 400030, China; wangxiao278@cqu.edu.cn

\* Correspondence: maoyupeng@pe.neu.edu.cn (Y.M.); wangqi@mail.neu.edu.cn (Q.W.)

**Supplementary Movie S1.** The self-powered piezoelectric sensor can transmit wireless signal to control the LED.  
**Supplementary Movie S2.** TENG can collect mechanical energy to drive micro GPS equipment to launch signal.  
**Supplementary Movie S3.** TENG charge capacitor.

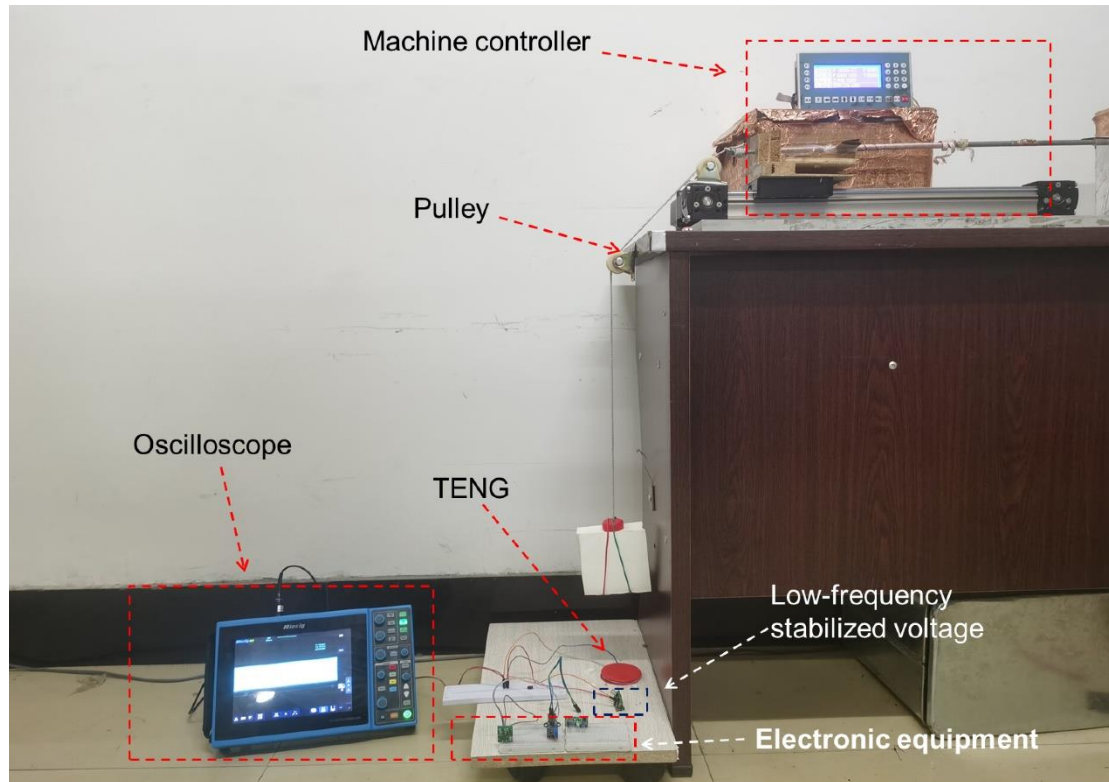

**Figure S1.** The actual test scenario.

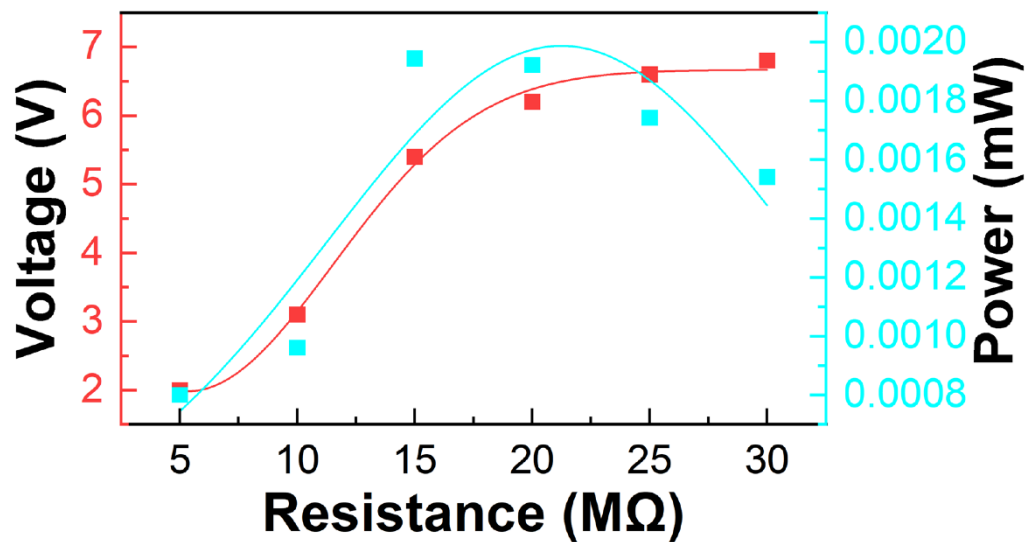

**Figure S2.** The output voltage and power of TENG against different resistance.

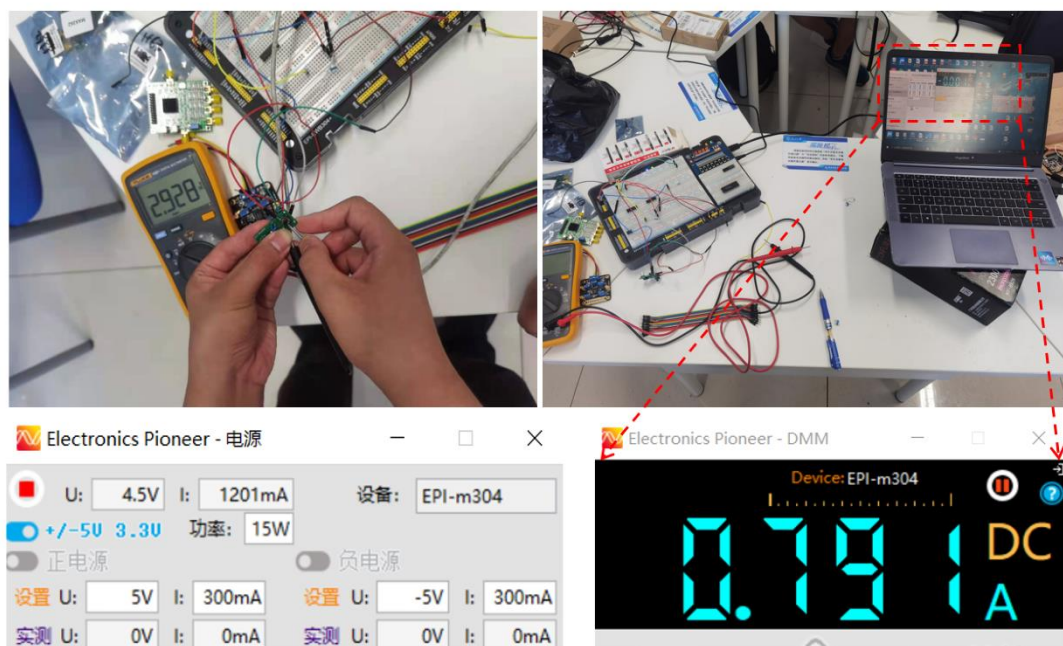

**Figure S3.** Single test process of AC/DC conversion efficiency.

**Table S1.** Power density comparison.

| Title        | Power                     | Area                  | Power density             | Reference |
|--------------|---------------------------|-----------------------|---------------------------|-----------|
| Our work     | $1.94 \times 10^{-3}$ mW  | 28.26 cm <sup>2</sup> | 0.686 mW/m <sup>2</sup>   | 47        |
| Other work 1 | $3.328 \times 10^{-6}$ mW | 16cm <sup>2</sup>     | 0.00208 mW/m <sup>2</sup> |           |
| Other work 2 | $6.4 \times 10^{-3}$ mW   | 6cm <sup>2</sup>      | 10.7 mW/m <sup>2</sup>    |           |
| Other work 3 | Unspecified               | Unspecified           | 0.042 mW/m <sup>2</sup>   |           |

47. Zeng, H.; He, H.X.; Fu, Y.M.; Zhao, T.M.; Han, W.X.; Xing, L.L.; Zhang, Y.; Zhan, Y.; Xue, X.Y. A self-powered brain-linked biosensing electronic-skin for actively tasting beverage and its potential application in artificial gustation. *Nanoscale* **2018**, *10*, 19987–19994.
48. Zhao, T.M.; Zheng, C.W.; He, H.X.; Guan, H.Y.; Zhong, T.Y.; Xing, L.L.; Xue, X.Y. A self-powered biosensing electronic-skin for real-time sweat Ca<sup>2+</sup> detection and wireless data transmission. *Smart Mater. Struct.* **2019**, *28*, 085015.
49. Zhao, T.M.; Li, J.L.; Zeng, H.; Fu, Y.M.; He, H.X.; Xing, L.L.; Zhang, Y.; Xue, X. Y. Self-powered wearable sensing-textiles for real-time detecting environmental atmosphere and body motion based on surface-triboelectric coupling effect. *Nanotechnology* **2018**, *29*, 405504.
